# Supplementary material for: Determination of 14 trace element concentrations in two Dillinger Hüttenwerke Portland cement reference materials by sector field and quadrupole ICP-MS
Source: Royal Society of Chemistry journal article supplement (doi:10.1039/b107106h), 2002-01-01
Supplement: tableesi-1.doc [file tableesi-1.doc]

**Electronic Supplementary Information**

**Table ESI-1:** Certified concentrations of major, minor and trace elements in Portlandcement X0201 and Portlandcement X0203 (Dillinger Hüttenwerke AG, Freiberg, Germany), as listed on the certificate.

|  | **Portland Cement X0201** | | | | Portland Cement X0203 | | |
| --- | --- | --- | --- | --- | --- | --- | --- |
|  | certified value |  | **method**** | certified value | |  | **method**** |
| Ca | 43.28 | % | 1 | 46.43 | | % | 1 |
| SiO2 | 22.56 | % | 1 | 20.59 | | % | 1 |
| Fe2O3 | 2.09 | % | 1 | 3.50 | | % | 1 |
| Mn3O4 | 0.125 | % | 1 | 0.053 | | % | 1 |
| P2O5 | 0.118 | % | 1 | 0.226 | | % | 1 |
| Al2O3 | 6.55 | % | 1 | 5.21 | | % | 1 |
| MgO | 2.19 | % | 1 | 1.37 | | % | 1 |
| TiO2 | 0.314 | % | 1 | 0.369 | | % | 1 |
| K2O | 0.907 | % | 1 | 0.577 | | % | 1 |
| SO3 | 4.28 | % | 1 | 2.68 | | % | 1 |
| ZrO2 | 0.032 | % | 1 | 0.046 | | % | 1 |
| Cr2O3 | 0.008 | % | 1 | 0.014 | | % | 1 |
| SrO | 0.118 | % | 1 | 0.124 | | % | 1 |
| Na2O | 0.145 | % | 2 | 0.280 | | % | 2 |
| F | 0.059 | % | 3 | 0.035 | | % | 3 |
| Cl | 0.010 * | % | 4 | 0.016 * | | % | 4 |
| As | 5.4 | µg g-1 | 5 | 11.1 | | µg g-1 | 5 |
| Ba | 222.1 | µg g-1 | 7 | 282.2 | | µg g-1 | 7 |
| Be | 2.8 | µg g-1 | 7 | 2.6 | | µg g-1 | 7 |
| Bi | <2.0 | µg g-1 | 6 | <2.0 | | µg g-1 | 6 |
| Cd | <2.5 | µg g-1 | 6 | <2.5 | | µg g-1 | 6 |
| Ce | 54.6 | µg g-1 | 6 | 54.5 | | µg g-1 | 6 |
| Co | 4.5 | µg g-1 | 6 | 13.5 | | µg g-1 | 6 |
| Cu | 7.0 | µg g-1 | 6 | 36.0 | | µg g-1 | 6 |
| In | <2.0 | µg g-1 | 6 | <2.0 | | µg g-1 | 6 |
| La | 27.3 | µg g-1 | 7 | 28.5 | | µg g-1 | 7 |
| Mo | <1.0 | µg g-1 | 6 | 4.0 | | µg g-1 | 6 |
| Ni | 14.3 | µg g-1 | 7 | 29.9 | | µg g-1 | 6 |
| Pb | 24.9 | µg g-1 | 6 | 80.0 * | | µg g-1 | 6 |
| Sb | <2.0 | µg g-1 | 6 | 3.6 | | µg g-1 | 6 |
| Se | <2.5 | µg g-1 | 5 | 2.3 | | µg g-1 | 5 |
| Te | <2.0 | µg g-1 | 6 | <2.0 | | µg g-1 | 6 |
| Th | 8.6 | µg g-1 | 6 | 7.4 | | µg g-1 | 6 |
| Tl | <2.0 | µg g-1 | 6 | <2.0 | | µg g-1 | 6 |
| U | 3.3 | µg g-1 | 6 | 4.3 | | µg g-1 | 6 |
| V | 100.4 | µg g-1 | 5 | 163.5 | | µg g-1 | 5 |
| Zn | 74.0 | µg g-1 | 7 | 474.9 | | µg g-1 | 7 |

* recommended values

** 1= XRF, 2 = AAS, 3 = distillation, ion selective electrode, 4= ion chromatography, 5 = ICP-OES, 6 = ICP-MS
