# Supplementary material for: Determination of 14 trace element concentrations in two Dillinger Hüttenwerke Portland cement reference materials by sector field and quadrupole ICP-MS
Source: Royal Society of Chemistry journal article supplement (doi:10.1039/b107106h), 2002-01-01
Supplement: tableesi-2.doc [file tableesi-2.doc]

**Electronic Supplementary Information**

**Table ESI-2:** Operating conditions for the Elan 6000 quadrupole ICP-MS and the Element2 sector field ICP-MS.

|  | Elan 6000 | Element2 |
| --- | --- | --- |
| RF Power/W | 1100 | 1250 |
| Gas flow rates/l min-1: |  |  |
| Plasma gas | 15 | 15 |
| Auxiliary gas | 0.70 | 0.96 |
| Nebuliser gas | 0.91 | 1.00 |
| Guard electrode | - | on |
| Isotopes measured: |  |  |
| 'Low' resolution | 9Be, 52Cr, 59Co, 60Ni, 63Cu, 66Zn, 75As, 82Se, 103Rh (i.s.), 114Cd, 120Sn, 121Sb, 205Tl, 208Pb | 9Be, 103Rh (i.s.), 114Cd, 120Sn, 205Tl, 208Pb |
| 'Medium' resolution | - | 51V, 52Cr, 59Co, 60Ni, 63Cu, 66Zn, 103Rh (i.s.), 121Sb |
| 'High' resolution | - | 75As, 78Se, 103Rh (i.s.) |
| Scanning mode | Peak hopping | B-scan + E-scan |
| Dwell time (sample time)/ms | 10 | 10 (75As: 50; 78Se: 100) |
| Integrated points (samples) per peak |  |  |
| 'Low' resolution | 1 | 10 |
| 'Medium' resolution | - | 8 |
| 'High' resolution | - | 75As: 10; 78Se: 4 |
| Integration window |  |  |
| 'Low' resolution | - | 20 |
| 'Medium' resolution | - | 80 |
| 'High' resolution | - | 75As: 65; 78Se: 20 |
| No. of sweeps (passes) per replicate (run) | 30 | 8 |
| No. of replicates (runs) | 5 | 3 |
| Detector mode | Dual (pulse counting and analogue) | Dual (pulse counting and analogue) |

i.s. = internal standard
