# Supplementary material for: Determination of 14 trace element concentrations in two Dillinger Hüttenwerke Portland cement reference materials by sector field and quadrupole ICP-MS
Source: Royal Society of Chemistry journal article supplement (doi:10.1039/b107106h), 2002-01-01
Supplement: tableesi-3.doc [file tableesi-3.doc]

**Electronic Supplementary Information**

**Table ESI-3:** Major polyatomic interferences on the measured elements, concentration of the interfering matrix element in the solid material and theoretically required resolution to resolve the interference.

| Interfered isotope | Polyatomic interference | Concentration interfering matrix element / % | | Required resolution |
| --- | --- | --- | --- | --- |
|  |  | **X0201** | **X0203** |  |
| 75As+ | 40Ar35Cl+ |  |  | 7773 |
|  | 40Ca35Cl+ | 43 | 46 | 7614 |
| 59Co+ | (43Ca16O+) |  |  | 2878 |
|  | 40Ar19F+ |  |  | 2137 |
|  | 40Ca19F+ | 43 | 46 | 2121 |
| 52Cr+ | 36Ar16O+ |  |  | 2367 |
|  | 35Cl16OH+ |  |  | 1672 |
| 53Cr+ | 37Cl16O+ |  |  | 2626 |
| 54Cr+ | 40Ar14N+ |  |  | 2088 |
|  | 37Cl16OH+ |  |  | 1859 |
| 63Cu+ | 28Si35Cl+ | 10.6 | 9.6 | 3889 |
|  | 47Ti16O+ | 0.20 | 0.22 | 3684 |
| 65Cu+ | 49Ti16O+ | 0.20 | 0.22 | 4331 |
|  | 28Si37Cl+ | 10.6 | 9.6 | 4318 |
| 58Ni+ | 42Ca16O+ | 43 | 46 | 3186 |
| 60Ni+ | 44Ca16O+ | 43 | 46 | 3057 |
| 61Ni+ | 44Ca16OH+ | 43 | 46 | 2243 |
| 62Ni+ | 46Ti16O+ | 0.20 | 0.22 | 3226 |
| 64Ni+ | 48Ti16O+ | 0.20 | 0.22 | 4293 |
| 76Se+ | 40Ar36Ar+ |  |  | 7081 |
|  | 40Ar35ClH+ |  |  | 3824 |
| 77Se+ | 40Ar37Cl+ |  |  | 9182 |
| 78Se+ | 40Ar38Ar+ |  |  | 9970 |
| 80Se+ | 40Ar40Ar+ |  |  | 9688 |
|  | 40Ar40Ca+ | 43 | 46 | 9455 |
| 82Se+ | 66Zn16O+ | 0.0074 | 0.047 | 19316 |
|  | 81BrH+ |  |  | 11056 |
| 51V+ | 35Cl16O+ |  |  | 2573 |
|  | 37Cl14N+ |  |  | 2037 |
| 64Zn+ | 48Ti16O+ | 0.20 | 0.22 | 4293 |
